# Supplementary material for: Efficacy, safety and biomarker analysis of durvalumab in patients with mismatch-repair deficient or microsatellite instability-high solid tumours
Source: Springer Nature journal article supplement (doi:10.1186/s12885-023-10663-2), 2023-03-04
Supplement: MOESM2 [file 24097016]

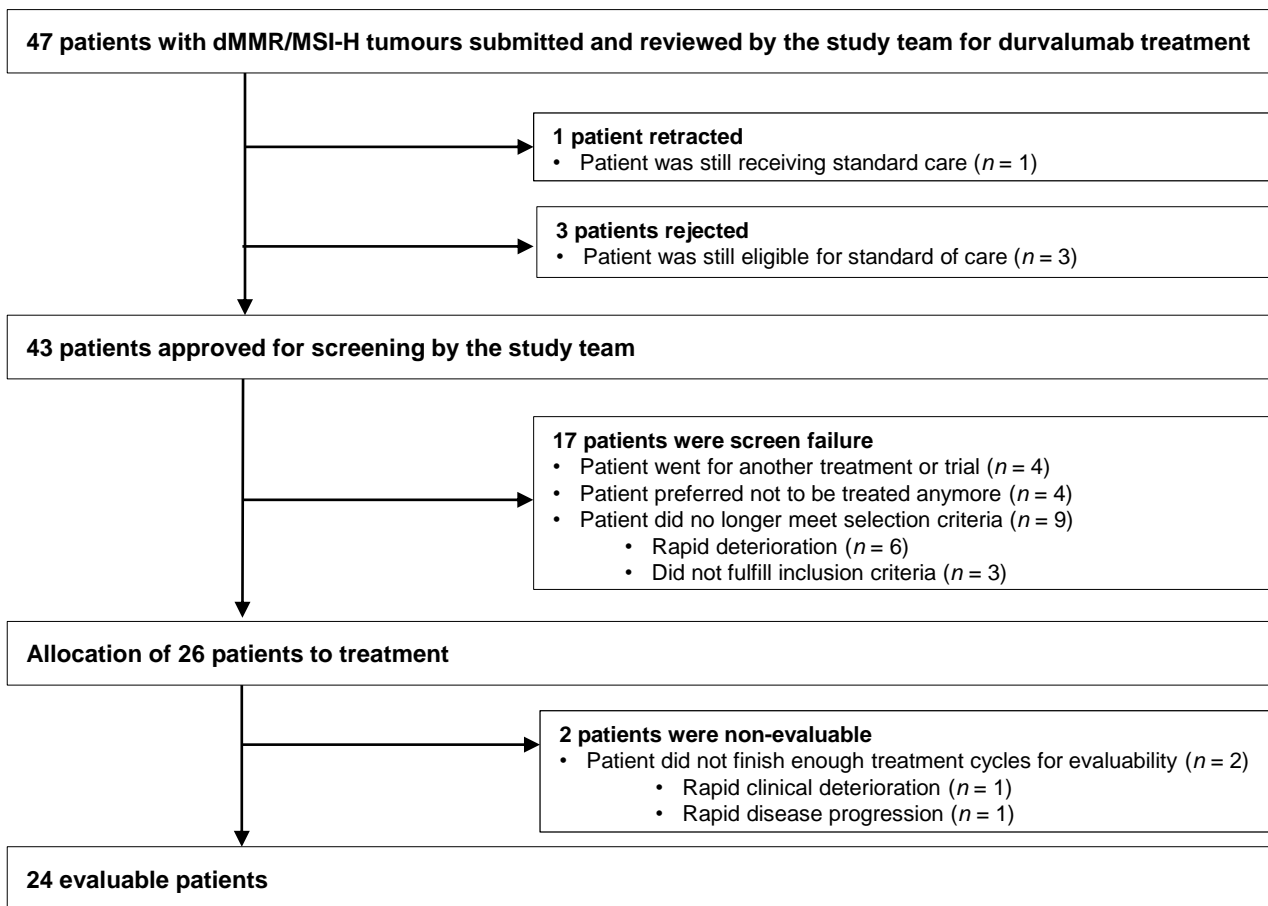

### Supplementary Figure S1: Flowchart

Flowchart of patients submitted to the study between January 2019 and April 2020, and reasons for rejection, screen failure and non-evaluability.
