# Supplementary material for: Efficacy, safety and biomarker analysis of durvalumab in patients with mismatch-repair deficient or microsatellite instability-high solid tumours
Source: BMC Cancer. 2023 Mar 4;23:205. doi: 10.1186/s12885-023-10663-2 (PMC9985217; doi:10.1186/s12885-023-10663-2)
Supplement: Supplementary file 1 — Additional file 1. [file 12885_2023_10663_MOESM1_ESM.xls]

## Sheet: Table S1
Supplementary Table S1: Clinical benefit and response rates
		n (%)	In total n (%)
Clinical benefit	CR (confirmed)	3 (12%)	13 (50%)
	PR (confirmed)	4 (15%)
	SD ≥ 16 weeks	6 (23%)
No clinical benefit	PD	11 (42%)	11 (42%)
Non-evaluable	NE	2 (8%)	2 (8%)
Table S1. Clinical benefit and response rates.
Abbreviations: CR, complete response; NE, non-evaluable; PD, progressive disease; PR, partial response; SD, stable disease
